# Supplementary material for: Indirect effects of overfishing on Caribbean reefs: sponges overgrow reef-building corals
Source: PubMed Central journal article supplement (PMC4419544; doi:10.7717/peerj.901), 2015-04-28

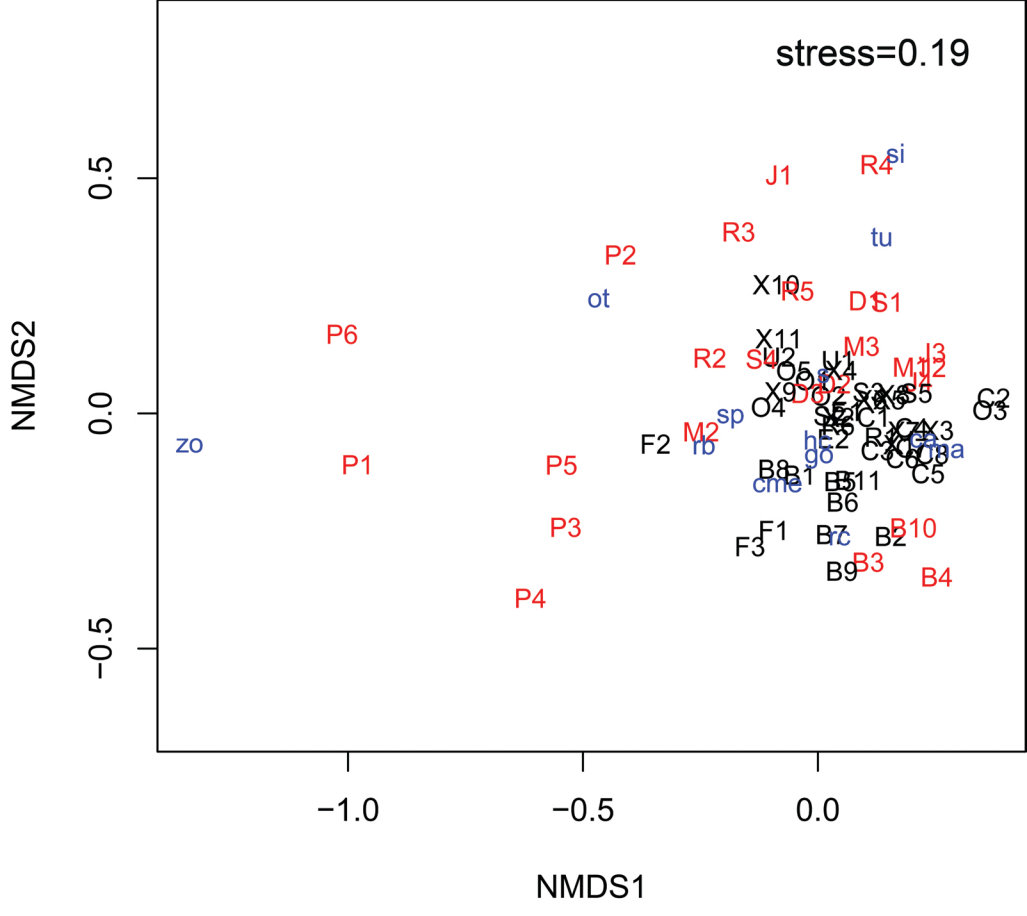

Supplement: peerj-03-901-s001.pdf [file peerj-03-901-s001.pdf]
