# Supplementary material for: Indirect effects of overfishing on Caribbean reefs: sponges overgrow reef-building corals
Source: PeerJ. 2015 Apr 28;3:e901. doi: 10.7717/peerj.901 (PMC4419544; doi:10.7717/peerj.901)
Supplement: Table S1 [file peerj-03-901-s002.xlsx]

## Sheet: Sheet1
Indirect effects of overfishing on Caribbean reefs: Sponges overgrow reef-building corals
T-L Loh, SE McMurray, TP Henkel, J Vicente & JR Pawlik
Location	Site	Site ID	Overfished?	tu	ca	cme	rc	go	hc	ma	ot	rb	s	si	sp	zo
Bahamas	Great Inagua, Devil’s Point	B1	N	1.28	10.24	1.12	23.68	3.36	14.24	16.16	0	4.48	9.44	0	15.84	0.16
	Exumas, Danger Reef	B2	N	0	4.12	0.48	17.27	8.56	11.09	46.44	0	0.32	0.95	0.32	10.46	0
	Nassau, Goulding Cay	B3	Y	0	1.44	0	21.63	5.61	18.75	29.8	0	0	7.37	0.96	14.42	0
	Bimini, Hawksbill Reef North	B4	Y	0	0.96	0	24.96	0.16	5.44	44.64	0	0.32	1.92	1.12	20.48	0
	Hogsty Reef	B5	N	1.6	4.48	0.16	27.84	0.64	12.48	22.08	0	0.8	5.76	0	24.16	0
	Little Inagua	B6	N	2.4	2.72	0.16	28.8	0.16	19.52	34.56	0.32	0.8	0.48	0.16	9.92	0
	Mira Por Vos Cays, North Rock	B7	N	0.32	3.04	1.6	7.52	4	28	50.56	0.32	0.16	0.8	0	3.68	0
	Great Inagua, NW Point	B8	N	2.56	9.12	1.28	21.44	0.8	17.92	13.92	0.16	12.96	7.04	0	12.8	0
	San Salvador	B9	N	0	0.48	0	30.9	3.17	6.5	36.45	0.16	0.63	2.69	2.54	16.48	0
	Cat Cay, Tuna Alley	B10	Y	0.32	5.44	0.16	16.64	3.84	4.16	52.96	0	0	6.72	0	9.76	0
	West Plana Cay	B11	N	4.48	9.12	0	35.2	3.52	12	18.4	0	1.92	9.92	0	5.44	0
Bocas del Toro, Panama	Adriana's Reef	P1	Y	0	0	0	2.88	0	23.84	0	1.6	8	0.32	0	54.88	8.48
	Bastimentos Point	P2	Y	22.28	1.6	0.48	0.8	8.33	1.44	7.37	0.48	0.16	1.12	0	52.24	3.69
	Hospital Point	P3	Y	0	1.44	1.76	21.12	0	38.08	1.44	1.12	8.16	0.48	0	24	2.4
	Juan Point	P4	Y	0.16	0	0.48	4.96	0.96	38.08	0	0	10.08	1.44	0	43.04	0.8
	Punta Caracol	P5	Y	0	0.32	0	15.48	0.16	29.52	0	1.61	5.16	9.84	0	37.26	0.65
	Rio Grande	P6	Y	0	0	0	0	0	1.76	2.08	1.44	3.68	8.8	0	74.4	7.84
Bonaire	Bachelor's Beach	O1	N	17.76	4.16	1.28	5.76	6.08	36	15.36	0.16	0.32	7.84	0.32	4.96	0
	Candyland	O2	N	15.68	10.24	0.16	8.8	5.12	33.12	19.2	0.32	0.48	0.96	0.48	5.44	0
	Lac Cai	O3	N	8.32	17.28	0	1.44	1.44	30.88	36.16	0	0.32	1.28	0.48	2.24	0.16
	Soft Coral Dreams	O4	N	16.32	5.44	2.56	6.08	16.96	29.12	2.4	0	1.76	7.52	0.32	11.52	0
	Weber's Joy	O5	N	20.32	4.64	1.92	9.44	2.4	37.6	10.08	0.64	0.48	9.6	0.16	2.72	0
Cayman Islands	Little Cayman, Ann’s Attic	C1	N	4	8.32	0	4.64	0.48	16.16	41.76	0.32	0.48	4.64	1.6	17.6	0
	Little Cayman, Diver’s Delight	C2	N	14.24	8.64	0.32	1.28	0.96	28.32	40.8	0	0	0.32	0.32	4.8	0
	Grand Cayman, Hepp’s Pipeline	C3	N	5.6	9.44	0.8	4.64	0.64	18.56	46.88	0.32	0.32	0.64	0	12.16	0
	Grand Cayman, Oro Verde	C4	N	11.2	11.2	0.64	10.72	0	17.6	35.2	0	1.92	2.08	0	9.44	0
	Grand Cayman, Palace Reef	C5	N	2.24	15.04	0.96	3.84	1.6	16.96	49.76	0	0.48	1.44	0	7.68	0
	Little Cayman, Sailfin	C6	N	1.76	10.88	0.16	6.08	2.56	15.84	51.68	0	0.64	3.68	0.32	6.4	0
	Little Cayman, Snapshot	C7	N	3.04	9.6	0	5.28	1.12	15.84	50.56	0	1.44	1.76	0.16	11.2	0
	Grand Cayman, Seaview Reef	C8	N	6.56	11.04	0.16	7.52	0.32	20.64	44.48	0	4	0.8	0	4.48	0
Curaçao	Daaibooi	U1	N	30.88	4.64	0.8	6.72	0.96	15.84	25.92	0.32	1.28	6.4	0.8	5.44	0
	Snake Bay	U2	N	24.16	3.2	1.28	7.68	0.64	37.6	8.48	0.32	5.44	7.52	0.16	3.52	0
Dominican Republic	Bayahibe, Atlantic Princess	D1	Y	32.78	4.8	0	0.83	2.81	25	11.25	0	0.99	3.97	3.81	13.74	0
	Bayahibe, Ojo de Maria	D2	Y	13.88	3.64	0.66	2.31	2.98	33.39	25.95	0	0.99	3.64	0.5	11.9	0.17
	Isla Saona, Reuben	D3	Y	10.4	4.16	1.12	1.92	3.52	33.6	19.04	0.16	0.16	3.52	0.32	22.08	0
St Eustatius	The Blocks	E1	N	10.72	10.72	0.32	5.12	3.68	11.52	32.64	0.16	0.32	9.28	0	15.36	0.16
	Barracuda Point	E2	N	7.36	10.24	1.28	11.2	1.76	11.36	32.32	0.48	0	8.32	0	15.68	0
Jamaica	Columbus Park	J1	Y	17.28	0.96	0	0.48	0.64	11.2	15.36	2.88	1.6	0.64	25.44	23.52	0
	Discovery Bay, Dairy Bull	J2	Y	6.24	1.92	0.16	2.88	0	8.64	68	0	1.6	5.28	0.48	4.64	0.16
	Discovery Bay, M1	J3	Y	12.64	3.2	0	4	0	5.28	57.28	0	1.44	7.68	1.28	7.2	0
	Pear Tree Bottom	J4	Y	13.44	4.64	0.16	4.48	0.16	6.24	60.96	0	1.12	4.8	0.32	3.68	0
Key Largo, Florida	Conch Reef	F1	N	0.32	4.48	1.12	11.04	9.28	2.08	33.28	0.48	0	11.04	0	26.88	0
	North Dry Rocks	F2	N	2.24	4	0.8	16.32	10.56	2.24	6.24	1.6	11.2	10.56	0	32.96	1.28
	Pickles Reef	F3	N	0.96	7.52	1.28	36	10.4	8.32	19.52	0.32	1.44	1.12	0	10.24	2.88
Martinique	Pont du Burgos	M1	Y	7.2	6.24	0	3.2	0	4	52.8	0.16	1.28	8.32	0.16	16.64	0
	Cap Salomon	M2	Y	9.28	5.12	12.96	24.96	1.28	12.64	2.72	1.76	1.76	4.96	0	22.4	0.16
	Pointe Lezarde	M3	Y	10.56	2.24	1.28	6.24	0.16	3.2	52.16	0.64	0.64	2.24	0.32	20.32	0
Mexico	Akumal	X1	N	6.72	7.36	0.32	2.56	2.56	12.16	60.96	0.16	2.08	0.8	0	4.16	0.16
	Banco Chinchorro 1	X2	N	15.52	9.12	0.32	17.6	2.88	24.16	14.24	0	0.64	6.08	0.32	8.96	0.16
	Banco Chinchorro 10	X3	N	7.2	10.56	0	12.64	0.48	3.36	48	0	0.16	3.68	0.32	13.6	0
	Banco Chinchorro 11	X4	N	14.24	7.52	0.16	12.48	5.76	6.56	25.12	0.16	0.16	16.96	0.64	10.08	0.16
	Banco Chinchorro 12	X5	N	12	5.44	0	9.76	6.08	5.6	43.04	0	0.8	8.32	0.8	8.16	0
	Banco Chinchorro 3	X6	N	15.97	6.94	0	13.06	0.32	11.45	28.71	0	4.52	6.77	0	12.26	0
	Banco Chinchorro 5	X7	N	4.32	5.6	0	10.4	0.32	5.6	54.88	0	1.6	5.44	0.16	11.68	0
	Chancanaab, Cozumel	X8	N	16.64	4.8	0	11.04	0.16	12.96	32	0	0.16	3.36	0.16	18.72	0
	Columbia Reef Wall, Cozumel	X9	N	13.92	4.8	0.16	11.52	0.48	26.4	17.76	1.92	0	4.16	0	18.88	0
	Paraiso Bajo, Cozumel	X10	N	36.64	1.28	0	9.44	0.48	9.92	4	0.32	0.32	17.28	0.16	20.16	0
	San Clemente, Cozumel	X11	N	16.32	4.32	0.16	9.92	0.32	13.28	25.44	3.84	0.16	9.44	0.16	16.16	0.48
Puerto Rico	Desecheo, Candyland	R1	N	4	5.76	0.48	5.12	0.64	14.08	50.24	0	2.08	7.68	0	9.92	0
	La Paguera, Enrique Key	R2	Y	10.4	0	0.16	14.4	9.92	15.36	6.08	0.8	1.6	11.36	6.4	23.2	0.32
	La Paguera, Mata la Gata	R3	Y	34.08	1.28	0	0.48	14.08	16	1.28	1.44	1.12	4.96	5.44	19.84	0
	Aguadilla, El Natural	R4	Y	38.4	0.32	0.16	0.32	0	9.12	8.96	0	0.48	16.64	7.68	17.92	0
	Cabo Rojo, El Negro	R5	Y	33.12	1.6	0.32	1.92	4	19.68	24	3.36	1.76	2.56	0.16	7.52	0
	La Paguera, Old Buoy	R6	N	6.88	6.24	0.32	12.16	4.16	15.68	30.24	0.16	0.64	8.8	0.16	14.56	0
St Lucia	Crab Leg	S1	Y	19.84	6.4	0	1.76	0.16	4.8	28.64	0.16	1.76	9.76	9.12	17.6	0
	Fairyland	S2	N	8.64	11.36	0.96	3.84	1.92	22.72	25.6	0.32	1.12	5.12	0	18.4	0
	Grand Caille	S3	N	16.16	6.56	0	4.8	0.8	15.52	36.8	0.16	0.96	7.04	0	11.2	0
	Malgretoute	S4	Y	13.28	5.92	0	11.68	0.48	13.6	4.8	0.8	4.64	16	2.08	26.72	0
	Piton Wall	S5	N	6.72	5.12	0	3.68	0	13.12	59.36	0.16	3.04	3.52	0.48	4.8	0
